# Supplementary material for: Improvement efficiency of a dye-sensitized solar cell using Eu3+ modified TiO2 nanoparticles as a secondary layer electrode
Source: Royal Society of Chemistry journal article supplement (doi:10.1039/c0jm00549e), 2010-01-01
Supplement: c0jm00549e.pdf [file c0jm00549e.pdf]

## Supplementary Information

### Improvement efficiency of dye-sensitized solar cell using $\text{Eu}^{3+}$ modified $\text{TiO}_2$ nanoparticles as a secondary layer electrode

Jing-Hong Huang,<sup>a</sup> Po Yu Hung,<sup>b</sup> Shu-Fen Hu<sup>\*b</sup> and Ru-Shi Liu<sup>\*a</sup>

<sup>a</sup> Department of Chemistry, National Taiwan University, Taipei 106, Taiwan

<sup>b</sup> Department of Physics, National Taiwan Normal University, Taipei 106, Taiwan

\*Corresponding authors: sfhu.hu@gmail.com and rslu@ntu.edu.tw.

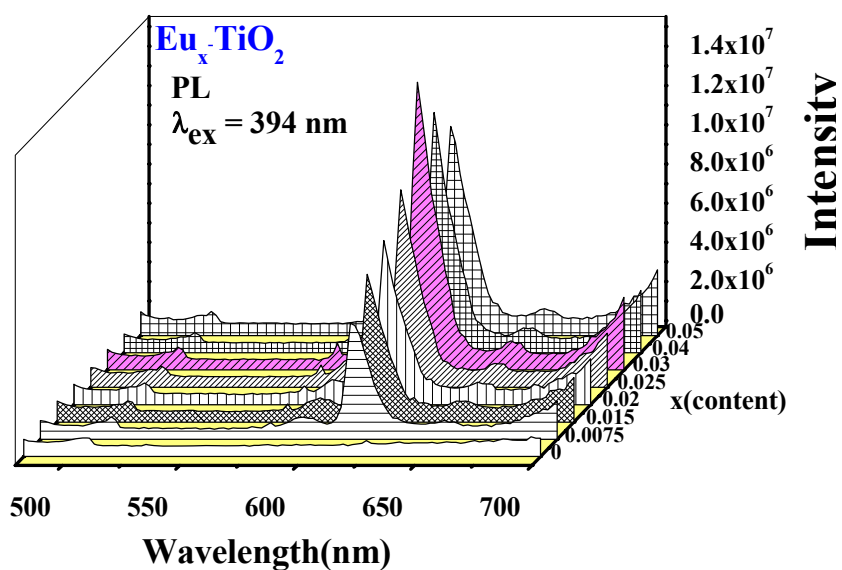

**Figure S1.** Photoluminescence spectra for  $\text{Eu}_x\text{-TiO}_2$  with  $x = 0, 0.0075, 0.015, 0.02, 0.025, 0.03, 0.04$  and  $0.05$ .

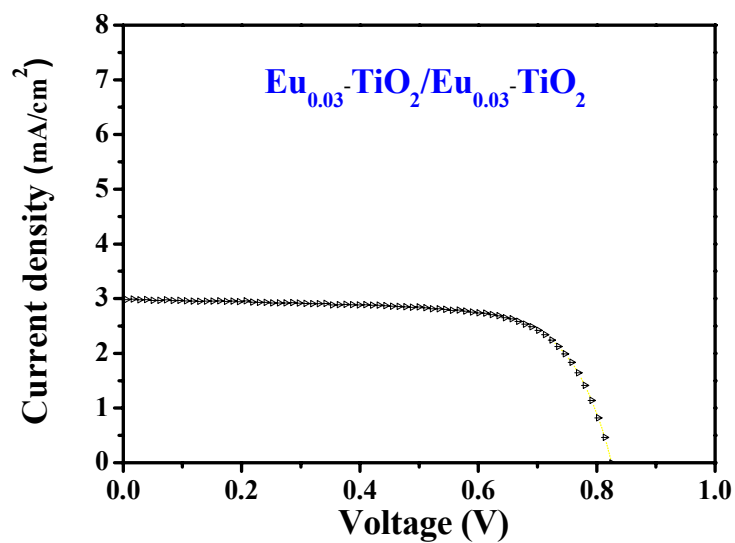

**Figure S2.** Voltage (V) as a function of current density (J) for double-layered electrode, which is constructed by using unmodified TiO<sub>2</sub> for two layers.

**Table S1.** Result for curve of current density (J) vs. potential for only Eu<sup>3+</sup><sub>0.03</sub> modified TiO<sub>2</sub> electrode

| Structure                                                       | V <sub>OC</sub> (V) | J <sub>SC</sub><br>(mA/cm <sup>2</sup> ) | FF   | η (%)   |
|-----------------------------------------------------------------|---------------------|------------------------------------------|------|---------|
| only Eu <sup>3+</sup> <sub>0.03</sub> modified TiO <sub>2</sub> | 0.82                | 2.99                                     | 0.58 | 1.78(2) |
